# Supplementary material for: Laparoscopic versus open hepatectomy for hepatocellular carcinoma with cirrhosis: a single-center propensity score matching analysis
Source: PubMed Central journal article supplement — Ann Transl Med. 2021 Dec;9(23):1733. doi: 10.21037/atm-21-5833 (PMC8743702; doi:10.21037/atm-21-5833), 2021-12
Supplement: atm-09-23-1733-dss.pdf [file atm-09-23-1733-dss.pdf]

## Data Sharing Statement

|                     |                                                                                                                                                     |                                                                                          |
|---------------------|-----------------------------------------------------------------------------------------------------------------------------------------------------|------------------------------------------------------------------------------------------|
| <b>Article Info</b> | <a href="https://dx.doi.org/10.21037/atm-21-5833">https://dx.doi.org/10.21037/atm-21-5833</a>                                                       |                                                                                          |
| <b>Item</b>         | <b>Question</b>                                                                                                                                     | <b>Authors' Response<br/>(place "-" if not applicable)</b>                               |
| 1                   | Would you like to share data collected for your study to others?                                                                                    | Yes.                                                                                     |
| 2                   | If not, would you like to share the reason for your decision?                                                                                       | -                                                                                        |
| 3                   | What data in particular will be shared?                                                                                                             | Clinical baseline data.                                                                  |
| 4                   | Any other documents will be shared? Such as study protocol, statistical analysis plan, informed consent form, clinical study report, analytic code. | -                                                                                        |
| 5                   | When will data availability begin?                                                                                                                  | After publication.                                                                       |
| 6                   | When will data availability end?                                                                                                                    | June 2023.                                                                               |
| 7                   | To whom will you share the data?                                                                                                                    | Researchers who are interested in this.                                                  |
| 8                   | For what type of analysis or purpose?                                                                                                               | Study or research is ok.                                                                 |
| 9                   | How or where can the data/documents be obtained?                                                                                                    | Emails could be sent to the address below to obtain the shared data: pengtaogmu@163.com. |
| 10                  | Any other restrictions?                                                                                                                             | No.                                                                                      |
